# Supplementary material for: Chemerin inhibits vascular calcification through ChemR23 and is associated with lower coronary calcium in chronic kidney disease
Source: PubMed Central journal article supplement — J Intern Med. 2019 Jul 7;286(4):449–57. doi: 10.1111/joim.12940 (PMC6852438; doi:10.1111/joim.12940), 2019-07-07
Supplement: JOIM-286-449-s001.pdf [file JOIM-286-449-s001.pdf]

**Supplementary table.**

| <b>Gene</b> | <b>Assay ID</b> |
|-------------|-----------------|
| MGP         | Mm00485009_m1   |
| Runx2       | Mm00501584_m1   |

**Supplementary table 1:** TaqMan assays used in the experiments
